# Supplementary material for: Development of an ensemble machine learning prognostic model to predict 60-day risk of major adverse cardiac events in adults with chest pain
Source: bioRxiv or medRxiv preprint supplement (doi:10.1101/2021.03.08.21252615), 2021-10-14
Supplement: Supplementary file [file media-1.pdf]

Supplemental Information for:

*Development of an ensemble machine learning prognostic model to predict 60-day risk of major adverse cardiac events in adults with chest pain*

Version: March 8, 2021

## A Appendix

### A.1 Predictor summary

This table summarizes the predictors used in the model following missing value imputation and histogram condensing of unique values for high-cardinality variables. This table includes 71 total predictors but totals 74 predictors when the race predictor is decomposed from a categorical predictor into 4 indicator predictors.

**Table A1.** Summary of predictors

|                     | Name                | Unique values | Mode | Mean | Median | Minimum | Maximum |
|---------------------|---------------------|---------------|------|------|--------|---------|---------|
| <b>Biomarkers</b>   |                     |               |      |      |        |         |         |
| 1                   | ECG                 | 3             | 0    | 0    | 0      | 0       | 2       |
| 2                   | Peak troponin       | 6             | 0    | 0    | 0      | 0       | 0       |
| 3                   | Troponin 3HV        | 29            | 0    | 0    | 0      | 0       | 0       |
| 4                   | Troponin categories | 2             | 1    | 1    | 1      | 1       | 2       |
| <b>Scores</b>       |                     |               |      |      |        |         |         |
| 5                   | EDACS               | 41            | 8    | 11   | 12     | -8      | 34      |
| 6                   | HEART               | 9             | 4    | 4    | 4      | 0       | 8       |
| 7                   | High EDACS          | 2             | 0    | 0    | 0      | 0       | 1       |
| 8                   | High HEART          | 2             | 1    | 1    | 1      | 0       | 1       |
| <b>Labs</b>         |                     |               |      |      |        |         |         |
| 9                   | GFR                 | 96            | 70   | 66   | 70     | 2       | 70      |
| 10                  | HbA1c               | 83            | 6    | 6    | 6      | 4       | 15      |
| 11                  | HDL                 | 148           | 48   | 51   | 50     | 4       | 213     |
| 12                  | LDL                 | 137           | 111  | 104  | 103    | 8       | 546     |
| 13                  | Total Cholesterol   | 104           | 186  | 181  | 181    | 33      | 1075    |
| 14                  | Triglycerides       | 86            | 5    | 5    | 5      | 3       | 9       |
| <b>Vitals</b>       |                     |               |      |      |        |         |         |
| 15                  | BMI                 | 100           | 30   | 30   | 28     | 12      | 82      |
| 16                  | Lowest SBP          | 174           | 120  | 121  | 120    | 42      | 244     |
| 17                  | O2 saturation       | 45            | 100  | 98   | 98     | 16      | 100     |
| 18                  | Obesity             | 2             | 0    | 0    | 0      | 0       | 1       |
| 19                  | Peak pulse          | 153           | 77   | 84   | 82     | 24      | 269     |
| 20                  | Pulse               | 168           | 74   | 80   | 78     | 12      | 256     |
| 21                  | Respiration         | 67            | 18   | 18   | 18     | 2       | 100     |
| 22                  | SBP                 | 155           | 145  | 145  | 143    | 56      | 269     |
| <b>Demographics</b> |                     |               |      |      |        |         |         |
| 23                  | Age                 | 87            | 53   | 59   | 59     | 18      | 104     |
| 24                  | Male                | 2             | 0    | 0    | 0      | 0       | 1       |

**Table A1.** Summary of predictors

|                               | Name                        | Unique values | Mode  | Mean | Median | Minimum | Maximum |
|-------------------------------|-----------------------------|---------------|-------|------|--------|---------|---------|
| 25                            | Race                        | 5             | White | -    | -      | -       | -       |
| <b>Clinical notes</b>         |                             |               |       |      |        |         |         |
| 26                            | Diaphoresis                 | 3             | 0     | 0    | 0      | 0       | 9       |
| 27                            | Exertion                    | 3             | 0     | 0    | 0      | 0       | 9       |
| 28                            | Pain on inspiration         | 3             | 0     | 0    | 0      | 0       | 9       |
| 29                            | Pain on palpation           | 3             | 0     | 0    | 0      | 0       | 9       |
| 30                            | Radiating pain              | 6             | 0     | 1    | 0      | 0       | 9       |
| 31                            | Sharp pain                  | 3             | 0     | 0    | 0      | 0       | 9       |
| <b>History</b>                |                             |               |       |      |        |         |         |
| 32                            | Anxiety                     | 2             | 0     | 0    | 0      | 0       | 1       |
| 33                            | Aortic athero.              | 2             | 0     | 0    | 0      | 0       | 1       |
| 34                            | APD                         | 2             | 0     | 0    | 0      | 0       | 1       |
| 35                            | CAD                         | 2             | 0     | 0    | 0      | 0       | 1       |
| 36                            | Coronary rev.               | 2             | 0     | 0    | 0      | 0       | 1       |
| 37                            | Diabetes                    | 2             | 0     | 0    | 0      | 0       | 1       |
| 38                            | Family history of CAD       | 2             | 0     | 0    | 0      | 0       | 1       |
| 39                            | Hypercholesteremia          | 2             | 1     | 1    | 1      | 0       | 1       |
| 40                            | Hypertension                | 2             | 1     | 1    | 1      | 0       | 1       |
| 41                            | Myocardial infarction       | 2             | 0     | 0    | 0      | 0       | 1       |
| 42                            | PAD                         | 2             | 0     | 0    | 0      | 0       | 1       |
| 43                            | Pre-diabetes                | 2             | 0     | 0    | 0      | 0       | 1       |
| 44                            | Prior catheter              | 2             | 0     | 0    | 0      | 0       | 1       |
| 45                            | Prior CT                    | 2             | 0     | 0    | 0      | 0       | 1       |
| 46                            | Prior echo                  | 2             | 0     | 0    | 0      | 0       | 1       |
| 47                            | Prior MPI                   | 2             | 0     | 0    | 0      | 0       | 1       |
| 48                            | Prior treadmill             | 2             | 0     | 0    | 0      | 0       | 1       |
| 49                            | Prior UTL                   | 2             | 0     | 0    | 0      | 0       | 1       |
| 50                            | Smoking                     | 2             | 0     | 0    | 0      | 0       | 1       |
| 51                            | Stroke                      | 2             | 0     | 0    | 0      | 0       | 1       |
| <b>Missingness indicators</b> |                             |               |       |      |        |         |         |
| 52                            | Missing BMI                 | 2             | 0     | 0    | 0      | 0       | 1       |
| 53                            | Missing Diaphoresis         | 2             | 0     | 0    | 0      | 0       | 1       |
| 54                            | Missing ECG                 | 2             | 0     | 0    | 0      | 0       | 1       |
| 55                            | Missing Exertion            | 2             | 1     | 1    | 1      | 0       | 1       |
| 56                            | Missing GFR                 | 2             | 0     | 0    | 0      | 0       | 1       |
| 57                            | Missing HbA1c               | 2             | 1     | 1    | 1      | 0       | 1       |
| 58                            | Missing HDL                 | 2             | 0     | 0    | 0      | 0       | 1       |
| 59                            | Missing LDL                 | 2             | 0     | 0    | 0      | 0       | 1       |
| 60                            | Missing O2 Saturation       | 2             | 0     | 0    | 0      | 0       | 1       |
| 61                            | Missing Obesity             | 2             | 0     | 0    | 0      | 0       | 1       |
| 62                            | Missing Pain on Inspiration | 2             | 1     | 1    | 1      | 0       | 1       |
| 63                            | Missing Pain on Palpation   | 2             | 1     | 1    | 1      | 0       | 1       |
| 64                            | Missing Pulse               | 2             | 0     | 0    | 0      | 0       | 1       |
| 65                            | Missing Radiating Pain      | 2             | 0     | 0    | 0      | 0       | 1       |
| 66                            | Missing Respiration         | 2             | 0     | 0    | 0      | 0       | 1       |
| 67                            | Missing SBP                 | 2             | 0     | 0    | 0      | 0       | 1       |
| 68                            | Missing Sharp Pain          | 2             | 1     | 1    | 1      | 0       | 1       |
| 69                            | Missing Total Cholesterol   | 2             | 0     | 0    | 0      | 0       | 1       |

**Table A1.** Summary of predictors

|    | Name                  | Unique values | Mode | Mean | Median | Minimum | Maximum |
|----|-----------------------|---------------|------|------|--------|---------|---------|
| 70 | Missing Triglycerides | 2             | 0    | 0    | 0      | 0       | 1       |
| 71 | Missing Troponin 3HV  | 2             | 0    | 0    | 0      | 0       | 1       |

## A.2 Decision tree benchmark

A single decision tree is a helpful benchmark approach to risk prediction. It is easy to explain and to visualize, and represents a decision-making process that can be conducted by medical staff. It is limited by its simplicity though: decision trees rarely have competitive predictive performance and the selected variables & cutpoints are known to be sensitive to small changes to the dataset. Figure A1 shows an example tree as estimated on our data.

**Figure A1.** Single decision tree, where each leaf node shows 1) predicted risk, and 2) the percentage of patients that fall into that node. Here Troponin refers to peak Troponin.

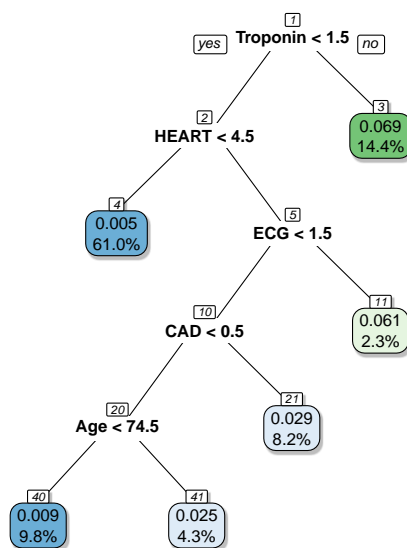

Of particular clinical interest is the blue leaf node (#4) showing a predicted risk of 0.5% and encompassing 61% of the sample. That node represents the lowest-risk group as identified by the decision tree. On first glance the identification of the low-risk group as comprising 61% of patients would seem to improve upon the 50% low-risk result from our complex nested ensemble. However, the 0.5% estimated risk for that leaf node is an average across the large proportion of patients that met the two simple decisions: non-elevated troponin and HEART score  $\leq 4$ . We know that every such patient doesn't have exactly 0.5% risk - there is a distribution around that average, with some patients have lower risk and others having higher risk. Thus we can see that this low-risk node must suffer from some miscalibration: an unknown proportion of those patients have higher risk than our target 0.5% threshold, and should not be discharged early despite the recommendation of the decision tree.

### A.3 Random forest convergence plot

The number of trees is a key hyperparameter for random forest. Breiman (2001) proved that adding additional trees does not lead to overfitting due to the independence of the tree estimators, unlike the sequential fitting of boosting approaches. Yet it remains beneficial to examine the convergence of the random forest's performance to ensure that an adequate number of trees is being used Probst et al. (2017). To assess performance convergence we analyzed the out-of-bag ROC-AUC for up to 3,000 trees, shown in Figure A2. From visual inspection we can see that only 100 trees would be inadequate, whereas 1,000 - 3,000 trees achieves an ROC-AUC above 0.85.

**Figure A2.** Random forest convergence plot shows ROC-AUC on out-of-bag data as forest size is increased exponentially.

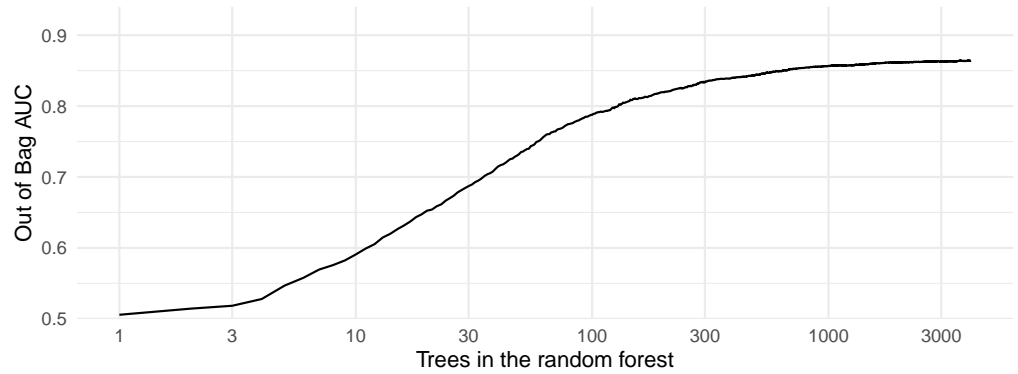

### A.4 Precision-Recall AUC table

**Table A2.** Cross-validated PR-AUC discrimination performance

| Learner                            | PR-AUC | Std. Err. | CI Lower | CI Upper |
|------------------------------------|--------|-----------|----------|----------|
| Marginal mean                      | 0.0188 | 0.0000    | 0.0187   | 0.0188   |
| Stratification (EDACS)             | 0.0456 | 0.0018    | 0.0422   | 0.0491   |
| Stratification (ECG)               | 0.0468 | 0.0019    | 0.0430   | 0.0506   |
| Decision tree (trop.)              | 0.0509 | 0.0015    | 0.0479   | 0.0539   |
| Decision tree (trop., ECG)         | 0.0509 | 0.0015    | 0.0479   | 0.0539   |
| Decision tree pruned               | 0.0509 | 0.0015    | 0.0479   | 0.0539   |
| Decision tree (trop., ECG, scores) | 0.0583 | 0.0012    | 0.0560   | 0.0607   |
| Decision tree                      | 0.0587 | 0.0012    | 0.0563   | 0.0611   |
| Logistic reg. (trop.)              | 0.0635 | 0.0030    | 0.0576   | 0.0695   |
| Logistic reg. (trop., ECG)         | 0.0635 | 0.0030    | 0.0576   | 0.0695   |
| Stratification (trop.)             | 0.0639 | 0.0030    | 0.0581   | 0.0698   |
| Stratification (HEART)             | 0.0643 | 0.0030    | 0.0585   | 0.0700   |
| Stratification (trop., ECG, EDACS) | 0.0871 | 0.0030    | 0.0812   | 0.0930   |
| Stratification (trop., ECG)        | 0.0887 | 0.0048    | 0.0792   | 0.0982   |
| Decision tree tuned                | 0.0944 | 0.0063    | 0.0820   | 0.1068   |
| Logistic reg. (trop., ECG, scores) | 0.0960 | 0.0034    | 0.0894   | 0.1026   |
| Stratification (trop., ECG, HEART) | 0.1011 | 0.0069    | 0.0876   | 0.1146   |
| Linear reg.                        | 0.1119 | 0.0066    | 0.0990   | 0.1248   |
| Lasso                              | 0.1195 | 0.0080    | 0.1038   | 0.1351   |
| Logistic reg.                      | 0.1199 | 0.0087    | 0.1029   | 0.1369   |
| XGBoost                            | 0.1239 | 0.0086    | 0.1071   | 0.1407   |
| Splines                            | 0.1250 | 0.0091    | 0.1072   | 0.1428   |
| BART                               | 0.1321 | 0.0090    | 0.1145   | 0.1496   |
| XGBoost tuned                      | 0.1387 | 0.0115    | 0.1161   | 0.1613   |
| Random forest                      | 0.1438 | 0.0103    | 0.1235   | 0.1641   |
| Random forest tuned                | 0.1457 | 0.0105    | 0.1252   | 0.1662   |
| SuperLearner                       | 0.1479 | 0.0117    | 0.1250   | 0.1709   |

**A.5 Receiver Operating Characteristic AUC table****A.6 Index of prediction accuracy table**

**Table A3.** Cross-validated ROC-AUC discrimination performance

| Learner                            | ROC-AUC | Std. Err. | CI Lower | CI Upper |
|------------------------------------|---------|-----------|----------|----------|
| Marginal mean                      | 0.5000  | 0.0108    | 0.4789   | 0.5211   |
| Stratification (ECG)               | 0.6864  | 0.0084    | 0.6699   | 0.7029   |
| Decision tree (trop.)              | 0.6983  | 0.0105    | 0.6777   | 0.7190   |
| Decision tree (trop., ECG)         | 0.6983  | 0.0105    | 0.6777   | 0.7190   |
| Decision tree pruned               | 0.6983  | 0.0105    | 0.6777   | 0.7190   |
| Logistic reg. (trop.)              | 0.7001  | 0.0084    | 0.6837   | 0.7166   |
| Logistic reg. (trop., ECG)         | 0.7001  | 0.0084    | 0.6837   | 0.7166   |
| Stratification (trop.)             | 0.7082  | 0.0084    | 0.6918   | 0.7246   |
| Stratification (EDACS)             | 0.7325  | 0.0053    | 0.7221   | 0.7428   |
| Stratification (HEART)             | 0.7647  | 0.0054    | 0.7541   | 0.7753   |
| Stratification (trop., ECG)        | 0.7707  | 0.0067    | 0.7577   | 0.7838   |
| Stratification (trop., ECG, EDACS) | 0.7715  | 0.0058    | 0.7601   | 0.7829   |
| Decision tree (trop., ECG, scores) | 0.7820  | 0.0069    | 0.7685   | 0.7956   |
| Decision tree                      | 0.7835  | 0.0069    | 0.7699   | 0.7971   |
| Decision tree tuned                | 0.8052  | 0.0053    | 0.7948   | 0.8156   |
| Logistic reg. (trop., ECG, scores) | 0.8058  | 0.0045    | 0.7970   | 0.8146   |
| Stratification (trop., ECG, HEART) | 0.8117  | 0.0048    | 0.8023   | 0.8212   |
| Linear reg.                        | 0.8379  | 0.0044    | 0.8292   | 0.8467   |
| Logistic reg.                      | 0.8422  | 0.0040    | 0.8344   | 0.8500   |
| Lasso                              | 0.8427  | 0.0039    | 0.8350   | 0.8504   |
| XGBoost                            | 0.8430  | 0.0039    | 0.8353   | 0.8507   |
| Splines                            | 0.8486  | 0.0039    | 0.8411   | 0.8562   |
| Random forest                      | 0.8571  | 0.0038    | 0.8498   | 0.8645   |
| XGBoost tuned                      | 0.8594  | 0.0036    | 0.8523   | 0.8665   |
| BART                               | 0.8609  | 0.0036    | 0.8539   | 0.8679   |
| Random forest tuned                | 0.8618  | 0.0036    | 0.8547   | 0.8688   |
| SuperLearner                       | 0.8665  | 0.0035    | 0.8596   | 0.8734   |

**Table A4.** Cross-validated index of prediction accuracy for each learner and the ensemble

| Learner                            | IPA    | Std. Err. | CI Lower | CI Upper |
|------------------------------------|--------|-----------|----------|----------|
| Marginal mean                      | 0.0000 | 0.0000    | 0.0000   | 0.0000   |
| Stratification (EDACS)             | 0.0138 | 0.0010    | 0.0118   | 0.0158   |
| Stratification (ECG)               | 0.0153 | 0.0015    | 0.0125   | 0.0182   |
| Logistic reg. (trop.)              | 0.0189 | 0.0020    | 0.0149   | 0.0229   |
| Logistic reg. (trop., ECG)         | 0.0189 | 0.0020    | 0.0149   | 0.0229   |
| Decision tree (trop.)              | 0.0234 | 0.0016    | 0.0203   | 0.0266   |
| Decision tree (trop., ECG)         | 0.0234 | 0.0016    | 0.0203   | 0.0266   |
| Decision tree pruned               | 0.0234 | 0.0016    | 0.0203   | 0.0266   |
| Stratification (HEART)             | 0.0243 | 0.0017    | 0.0210   | 0.0277   |
| Stratification (trop., ECG, EDACS) | 0.0253 | 0.0038    | 0.0179   | 0.0327   |
| Stratification (trop.)             | 0.0273 | 0.0022    | 0.0230   | 0.0317   |
| Decision tree (trop., ECG, scores) | 0.0278 | 0.0011    | 0.0256   | 0.0301   |
| Decision tree                      | 0.0283 | 0.0010    | 0.0263   | 0.0302   |
| Stratification (trop., ECG)        | 0.0384 | 0.0029    | 0.0327   | 0.0440   |
| Decision tree tuned                | 0.0393 | 0.0024    | 0.0345   | 0.0441   |
| Logistic reg. (trop., ECG, scores) | 0.0408 | 0.0018    | 0.0371   | 0.0444   |
| XGBoost                            | 0.0416 | 0.0092    | 0.0237   | 0.0596   |
| Stratification (trop., ECG, HEART) | 0.0433 | 0.0041    | 0.0352   | 0.0514   |
| Linear reg.                        | 0.0458 | 0.0018    | 0.0423   | 0.0492   |
| Logistic reg.                      | 0.0539 | 0.0047    | 0.0447   | 0.0631   |
| Lasso                              | 0.0544 | 0.0041    | 0.0463   | 0.0625   |
| Splines                            | 0.0565 | 0.0054    | 0.0459   | 0.0672   |
| BART                               | 0.0641 | 0.0047    | 0.0548   | 0.0733   |
| XGBoost tuned                      | 0.0660 | 0.0062    | 0.0539   | 0.0782   |
| DiscreteSL                         | 0.0661 | 0.0040    | 0.0582   | 0.0740   |
| Random forest                      | 0.0673 | 0.0035    | 0.0603   | 0.0742   |
| Random forest tuned                | 0.0682 | 0.0029    | 0.0626   | 0.0738   |
| SuperLearner                       | 0.0725 | 0.0045    | 0.0637   | 0.0813   |

**A.7 Brier score table**

**Table A5.** Cross-validated Brier score for each learner and the ensemble

| Learner                            | Brier score | Std. Err. | CI Lower | CI Upper |
|------------------------------------|-------------|-----------|----------|----------|
| Marginal mean                      | 0.01840     | 0.00001   | 0.01839  | 0.01842  |
| Stratification (EDACS)             | 0.01815     | 0.00001   | 0.01812  | 0.01818  |
| Stratification (ECG)               | 0.01812     | 0.00003   | 0.01807  | 0.01817  |
| Logistic reg. (trop.)              | 0.01806     | 0.00004   | 0.01797  | 0.01814  |
| Logistic reg. (trop., ECG)         | 0.01806     | 0.00004   | 0.01797  | 0.01814  |
| Decision tree (trop.)              | 0.01797     | 0.00003   | 0.01791  | 0.01804  |
| Decision tree (trop., ECG)         | 0.01797     | 0.00003   | 0.01791  | 0.01804  |
| Decision tree pruned               | 0.01797     | 0.00003   | 0.01791  | 0.01804  |
| Stratification (HEART)             | 0.01796     | 0.00003   | 0.01790  | 0.01801  |
| Stratification (trop., ECG, EDACS) | 0.01794     | 0.00006   | 0.01781  | 0.01807  |
| Stratification (trop.)             | 0.01790     | 0.00004   | 0.01781  | 0.01799  |
| Decision tree (trop., ECG, scores) | 0.01789     | 0.00002   | 0.01785  | 0.01793  |
| Decision tree                      | 0.01788     | 0.00002   | 0.01785  | 0.01792  |
| Stratification (trop., ECG)        | 0.01770     | 0.00006   | 0.01759  | 0.01781  |
| Decision tree tuned                | 0.01768     | 0.00005   | 0.01759  | 0.01777  |
| Logistic reg. (trop., ECG, scores) | 0.01765     | 0.00003   | 0.01759  | 0.01772  |
| XGBoost                            | 0.01764     | 0.00017   | 0.01730  | 0.01798  |
| Stratification (trop., ECG, HEART) | 0.01761     | 0.00008   | 0.01745  | 0.01776  |
| Linear reg.                        | 0.01756     | 0.00003   | 0.01750  | 0.01763  |
| Logistic reg.                      | 0.01741     | 0.00009   | 0.01724  | 0.01758  |
| Lasso                              | 0.01740     | 0.00008   | 0.01725  | 0.01755  |
| Splines                            | 0.01736     | 0.00010   | 0.01717  | 0.01756  |
| BART                               | 0.01722     | 0.00009   | 0.01705  | 0.01740  |
| XGBoost tuned                      | 0.01719     | 0.00012   | 0.01696  | 0.01742  |
| DiscreteSL                         | 0.01719     | 0.00008   | 0.01703  | 0.01734  |
| Random forest                      | 0.01717     | 0.00007   | 0.01703  | 0.01730  |
| Random forest tuned                | 0.01715     | 0.00006   | 0.01704  | 0.01726  |
| SuperLearner                       | 0.01707     | 0.00009   | 0.01690  | 0.01724  |

## A.8 Grouped calibration table

| Decile | Predicted risk | Observed risk | Predicted / Actual | Predicted - Actual |
|--------|----------------|---------------|--------------------|--------------------|
| 1      | 0.0005         | 0.0002        | 2.7813             | 0.0003             |
| 2      | 0.0011         | 0.0008        | 1.3707             | 0.0003             |
| 3      | 0.0018         | 0.0015        | 1.2685             | 0.0004             |
| 4      | 0.0031         | 0.0025        | 1.2329             | 0.0006             |
| 5      | 0.0050         | 0.0039        | 1.3012             | 0.0012             |
| 6      | 0.0080         | 0.0071        | 1.1301             | 0.0009             |
| 7      | 0.0129         | 0.0116        | 1.1115             | 0.0013             |
| 8      | 0.0211         | 0.0198        | 1.0660             | 0.0013             |
| 9      | 0.0376         | 0.0337        | 1.1159             | 0.0039             |
| 10     | 0.1041         | 0.1067        | 0.9759             | -0.0026            |

## References

Breiman, Leo (2001). “Random forests”. In: *Machine learning* 45.1, pp. 5–32.



Probst, Philipp and Anne-Laure Boulesteix (2017). “To tune or not to tune the number of trees in random forest”. In: *The Journal of Machine Learning Research* 18.1, pp. 6673–6690.
